# Supplementary material for: Post-Treatment HIV-1 Controllers with a Long-Term Virological Remission after the Interruption of Early Initiated Antiretroviral Therapy ANRS VISCONTI Study
Source: PubMed Central journal article supplement (PMC3597518; doi:10.1371/journal.ppat.1003211), 2013-03-14

Figure S4

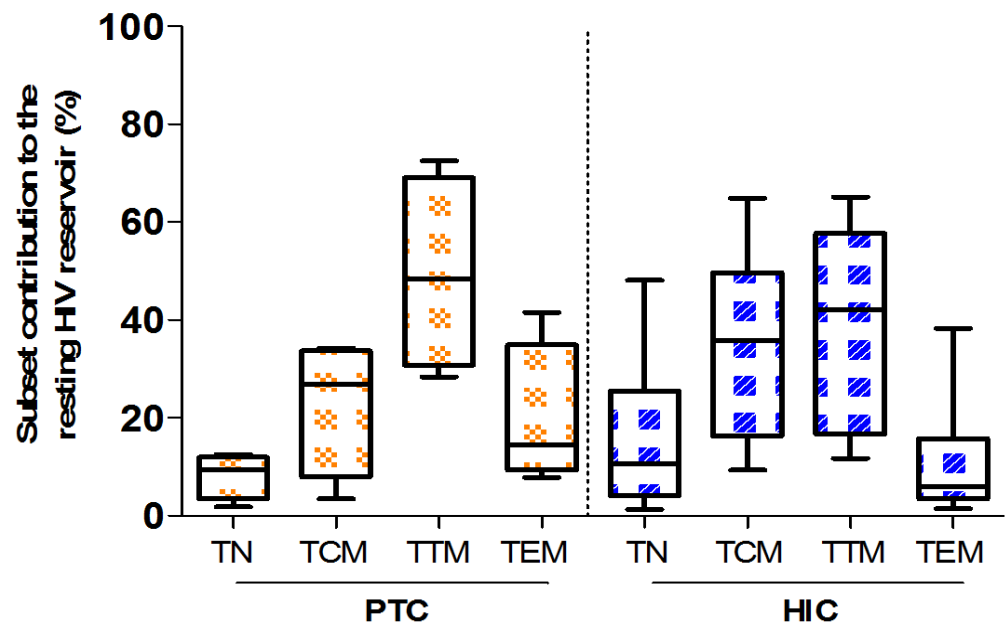

Supplement: ppat.1003211.s004.pdf [file ppat.1003211.s004.pdf]
