# Supplementary material for: Post-Treatment HIV-1 Controllers with a Long-Term Virological Remission after the Interruption of Early Initiated Antiretroviral Therapy ANRS VISCONTI Study
Source: PubMed Central journal article supplement (PMC3597518; doi:10.1371/journal.ppat.1003211), 2013-03-14
Supplement: ppat.1003211.s005.pdf [file ppat.1003211.s005.pdf]

Table S1. Characteristics of the CD8+ T cell response in PTC

| Patient Code | HLA     |         | log p24 decrease | ELISPOT<br>(SFC/10 <sup>6</sup> PBMC) |
|--------------|---------|---------|------------------|---------------------------------------|
|              |         |         |                  |                                       |
| <b>OR1</b>   | A*01/02 | B*35/49 | 0.52             | 56                                    |
| <b>OR2</b>   | A*23/-  | B*35/45 | 0.21             | 28                                    |
| <b>OR3</b>   | A*02/32 | B*14/49 | 2.56             | 2065                                  |
| <b>OR8</b>   | A*29/30 | B*44/47 | 1.18             | ND                                    |
| <b>KPV</b>   | A*24/30 | B*13/35 | 1.24             | 91                                    |
| <b>GXR</b>   | A*02    | B*45/51 | 0.17             | 425                                   |
| <b>CXK</b>   | A*02/11 | B*27/52 | 0.65             | ND                                    |
| <b>MWP</b>   | A*03/24 | B*35/44 | 0.00             | 420                                   |
| <b>JOGA</b>  | A*11/24 | B*07/55 | 0.27             | 203                                   |
| <b>OCP</b>   | A*11/30 | B*13/35 | 0.21             | 215                                   |
| <b>LY1</b>   | A*01/24 | B*07/57 | 0.61             | 2345                                  |
| <b>LY2</b>   | A*11/24 | B*07/27 | 0.22             | 260                                   |
| <b>MO1</b>   | A*02/03 | B*18/51 | 2.87             | 553                                   |
| <b>SL2</b>   | A*01/26 | B*05/13 | 0.04             | 0                                     |

ND: not done
