# Supplementary material for: Post-Treatment HIV-1 Controllers with a Long-Term Virological Remission after the Interruption of Early Initiated Antiretroviral Therapy ANRS VISCONTI Study
Source: PubMed Central journal article supplement (PMC3597518; doi:10.1371/journal.ppat.1003211), 2013-03-14
Supplement: ppat.1003211.s006.pdf [file ppat.1003211.s006.pdf]

Table S2. HLA allele frequencies in PTC, HIC and the French population

| Alleles          | French population frequency<br>N=6094 <sup>1</sup> | HIC frequency<br>N=148 | PTC frequency<br>N=28 | <i>p</i> value   | Pop vs HIC<br>( <i>p</i> value) | Pop vs PTC<br>( <i>p</i> value) | HIC vs PTC<br>( <i>p</i> value) |
|------------------|----------------------------------------------------|------------------------|-----------------------|------------------|---------------------------------|---------------------------------|---------------------------------|
| <b>B*27</b>      | 0.038                                              | 0.088                  | 0.071                 | <b>0.006</b>     | <b>0.004</b>                    | 0.671                           | 0.933                           |
| <b>B*57</b>      | 0.025                                              | 0.23                   | 0.036                 | <b>&lt;0.001</b> | <b>0.001</b>                    | 0.808                           | <b>0.036</b>                    |
| <b>B*07</b>      | 0.115                                              | 0.047                  | 0.107                 | <b>0.037</b>     | <b>0.015</b>                    | 0.868                           | 0.418                           |
| <b>B*35</b>      | 0.089                                              | 0.047                  | 0.179                 | <b>0.051</b>     | 0.105                           | 0.185                           | <b>0.034</b>                    |
| <b>B*27+B*57</b> | 0.063                                              | 0.318                  | 0.107                 | <b>&lt;0.001</b> | <b>0.001</b>                    | 0.570                           | <b>0.042</b>                    |
| <b>B*07+B*35</b> | 0.192                                              | 0.094                  | 0.286                 | <b>0.003</b>     | <b>0.001</b>                    | 0.404                           | <b>0.013</b>                    |

HIC : HIV controllers, PTC : Post-treatment controllers.

<sup>1</sup>from [www.allelefrequencies.com](http://www.allelefrequencies.com) ; <sup>2</sup>in bold statistically significant differences.
